# Supplementary material for: A mechanistic spatio-temporal framework for modelling individual-to-individual transmission—With an application to the 2014-2015 West Africa Ebola outbreak
Source: PubMed Central journal article supplement (PMC5679647; doi:10.1371/journal.pcbi.1005798), 2017-10-30

# S2 Figure

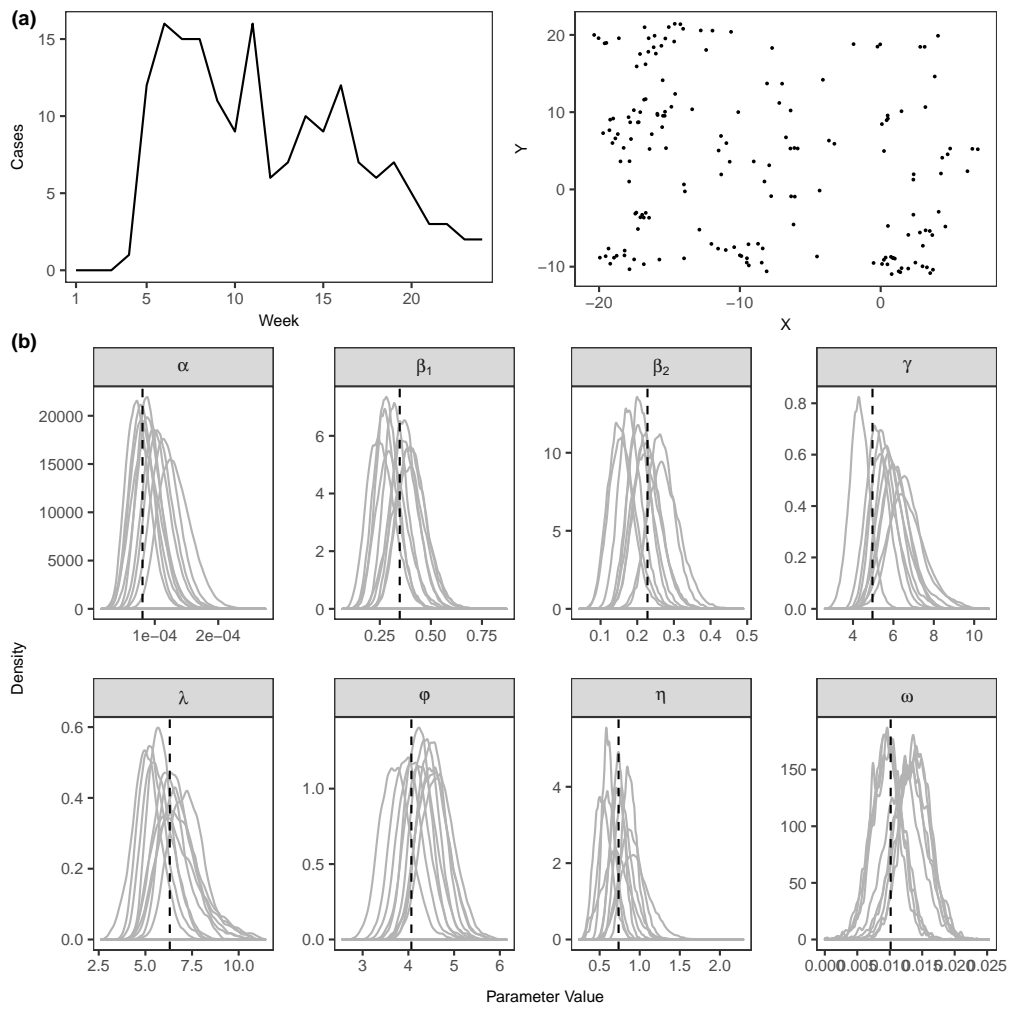

Supplement: pcbi.1005798.s003.pdf [file pcbi.1005798.s003.pdf]
