# Supplementary material for: A mechanistic spatio-temporal framework for modelling individual-to-individual transmission—With an application to the 2014-2015 West Africa Ebola outbreak
Source: PubMed Central journal article supplement (PMC5679647; doi:10.1371/journal.pcbi.1005798), 2017-10-30
Supplement: pcbi.1005798.s005.pdf [file pcbi.1005798.s005.pdf]

# S1 Table

Table S1

| Parameter                                                    | Median [95% C.I.]   |
|--------------------------------------------------------------|---------------------|
| $\alpha$ ( $\times 10^{-5}$ ), the baseline background rate  | 7.9 [4.73, 12.5]    |
| $\omega$ , intervention efficacy parameter                   | 0.01 [0.005, 0.015] |
| $\gamma$ , mean of the latent period                         | 4.9 [3.82, 6.25]    |
| $\lambda$ , s.d. of the latent period                        | 6.12 [4.79, 8.12]   |
| $\varphi$ , mean of the infectious period                    | 4.05 [3.53, 4.67]   |
| $\eta$ , parameter of the spatial dispersal density function | 0.73 [0.56, 0.95 ]  |
